# Supplementary material for: Obstructive Sleep Apnea Among Obese Patients With Type 2 Diabetes
Source: Oxford University Press journal article supplement (doi:10.2337/dc08-1776), 2009-03-11
Supplement: dc081776-sup-appendix-online_publication_only_1-09-09.doc [file dc081776-sup-appendix-online_publication_only_1-09-09.doc]

**Appendix**

Members of the Sleep AHEAD Research Group at each site consisted of the following individuals.

*Clinilabs:* Jon Freeman, PPSGT, Ph.D., Colleen Bartels, Cade McCullum, Phil Caffrey, Todd Bishop, Joel St. Hillaire, Wilson Iturralde, Amy Hinkelman, Jamie Park, Alexandria Reynolds, John Seto, Tatiana Majjul, Naomi Horowitz, Patrick Ornelas.

*University of Pennsylvania:* Brian McGuckin, Barbara Jane Maschak Cary, R.N., M.S.N.; Monica Mullen, R.D., M.P.H., Patti Lipschutz, M.S.N., Stephanie Ewing, Allan Pack, M.B., Ch.B., Ph.D., Richard Schwab, M.D., Mary Jones-Parker, RPSGT, Matthew Anastasi, RPSGT, Beth Staley, RPSGT, Timothy Kay, RPSGT, Kathy Kay, April Wells, Martha Hilton, Richard Byrne, Caroline Canty, Vivek Gahunia, Elizabeth Irish, Liz Roben, Jonathan Palma.

*University of Pittsburgh*: Rose Albright, Dawn Tucker, Laura Waterstram, Piera Kost, Rachel Givelber, M.D., Jackie Wesche-Thobaben, R.N.

*Brown University*: Renee Bright, Tammy Monk, Kimberly Chula, Carol Carlisle, R.N., Christina Rossi, Keri Greenier.

*Temple University*: Anita Patel, Nida Cassim
